# Supplementary material for: A 3D graphene-supported MoS2 nanosphere and nanosheet heterostructure as a highly efficient free-standing hydrogen evolution electrode
Source: Royal Society of Chemistry journal article supplement (doi:10.1039/c6ra05074c), 2016-01-01
Supplement: c6ra05074c1.pdf [file c6ra05074c1.pdf]

## Electronic Supplementary Information

### **3D graphene-supported MoS<sub>2</sub> nanosphere and nanosheet heterostructure as highly efficient free-standing hydrogen evolution electrode**

**Xuewan Wang\***

School of Chemical and Biomedical Engineering, Nanyang Technological University, 70 Nanyang Drive, 637457, Singapore.

#### **1. Synthesis of 3D graphene**

3D graphene was prepared by a previously-reported CVD method.<sup>1, 2</sup> In a typical synthesis route, nickel foam (Alantum Advanced Technology Materials, China) with a thickness of 0.5 mm was heated to 950 °C in tube furnace under argon (Ar, 55 sccm) and hydrogen (H<sub>2</sub>, 27 sccm) atmosphere, and maintained for 10 min. Ethanol was employed as carbon source and bubbled into the tube furnace at that temperature for 15 min. After the bubbling process, the furnace was quickly cooled to room temperature. Ni foam was removed by 3 M hydrochloric acid (HCl) and the remained 3D graphene was completely washed before drying at 100 °C.

#### **2. Preparation of 3D graphene-MoS<sub>2</sub> free-standing electrode**

For the synthesis of 3D graphene/MoS<sub>2</sub> composites, certain amount of ammonium tetrathiomolybdate (ATTM, Sigma-aldrich) was added into 20 mL DMF which contained 0.1 mL hydrazine monohydrate (Sigma-Aldrich, 64-65%). After ultrasonication for 30 min, the resultant clear solution was transferred into 80 mL Teflon-lined autoclave. Two pieces of 3D graphene (~2.5 cm × 3 cm) fixed on glass slides using silicone rubber were immersed into the precursor solution and heated at 200 °C for 12 h. The products were washed with deionized water and ethanol completely and dried at 50 °C. Pure MoS<sub>2</sub> was prepared by the same procedure in the absence of 3D graphene. Free-standing electrode was prepared by connecting hybrid foam with copper wire using silver paint. To avoid the possible HER interference, silver paint and copper wire was further insulated to the electrolyte with silicone rubber.

### 3. Characterization

The morphologies of 3D graphene and 3D graphene-MoS<sub>2</sub> were observed by field-emission scanning electron microscope (FESEM, Model JSM-6700F, JEOL) and transmission electron microscope (TEM) (JSM-6700F, JEOL). X-ray diffraction (XRD) patterns were carried out on D2 phaser X-ray diffractionmeter (Bruker) using Cu K $\alpha$  radiation. The Raman spectra were obtained by using Raman-Renishaw system with a laser wavelength of 514 nm.

### 4. Electrochemical measurements

All electrochemical measurements were performed using a CHI 660D electrochemical workstation (Chenhua, Shanghai) in a standard three electrode setup. Pt foil and saturated Ag/AgCl electrode were used as counter and reference electrode, respectively. Free-standing 3D graphene/MoS<sub>2</sub> electrode was directly used as work electrode. For comparison, pure 3D graphene electrode and Pt foil were also prepared as working electrodes. The precise area of working electrode equalled to the size of 3D graphene/MoS<sub>2</sub> pieces which was carefully measured on each of as-fabricated electrodes. The weight of 3D graphene-supported MoS<sub>2</sub> nanosphere and nanosheet heterostructure (sample C) was *ca.* 1.86 mg cm<sup>-2</sup> with MoS<sub>2</sub> of *ca.* 1 mg cm<sup>-2</sup>. The electrocatalytic performance of all electrodes was examined by polarization curves and Tafel plots *via* linear sweep voltammetry (LSV) at scan rate of 2 mV/s in 0.5 M H<sub>2</sub>SO<sub>4</sub>. Electrochemical impedance measurements were carried out at open circuit potential in the frequency range of 0.1 to 10<sup>5</sup> Hz with AC voltage amplitude of 10 mV. Ag/AgCl electrode was calibrated in H<sub>2</sub>-saturated 0.5 M H<sub>2</sub>SO<sub>4</sub> using Pt foil as the working electrode (see Fig. S5). Thus, all the potentials were recorded with respect to reversible hydrogen electrode (RHE) and with IR compensation.

### 5. Supplementary figures and table

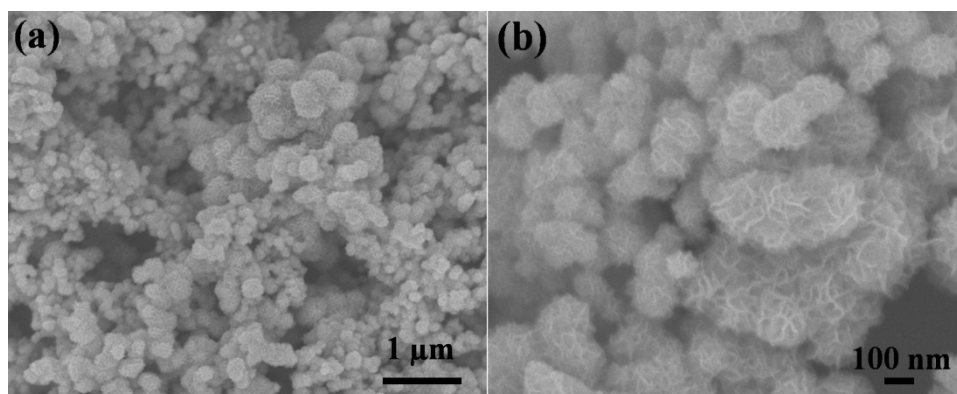

**Fig. S1** SEM images of bare MoS<sub>2</sub> synthesized in the absence of 3D graphene.

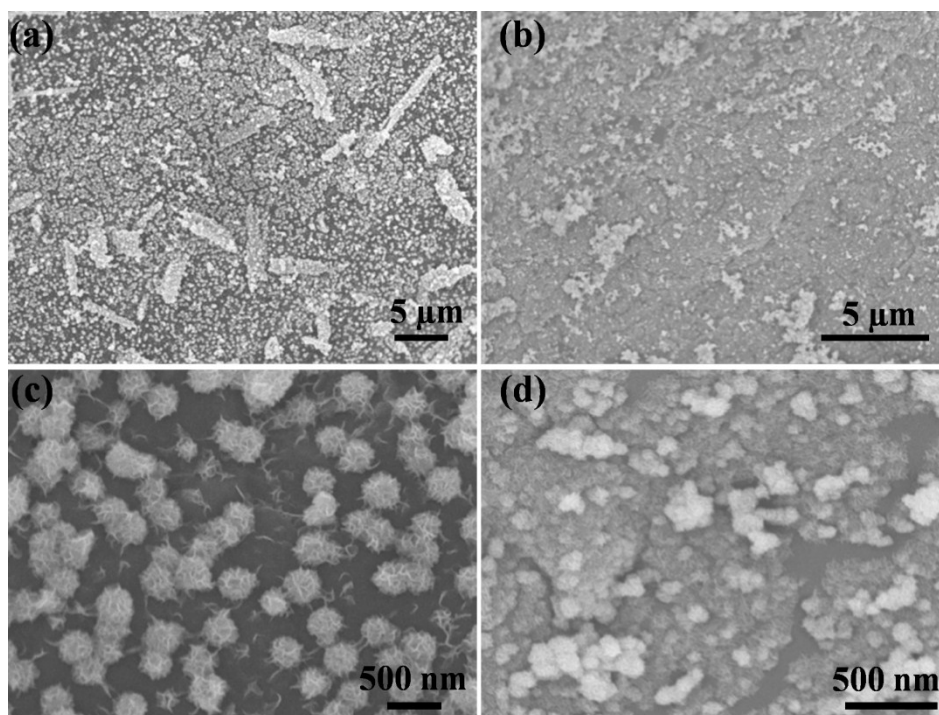

**Fig S2** SEM images of 3D graphene/MoS<sub>2</sub> sample B and D prepared at AMT concentration of (a and c) 1.1 mg/mL and (b and d) 4.4 mg/mL, respectively.

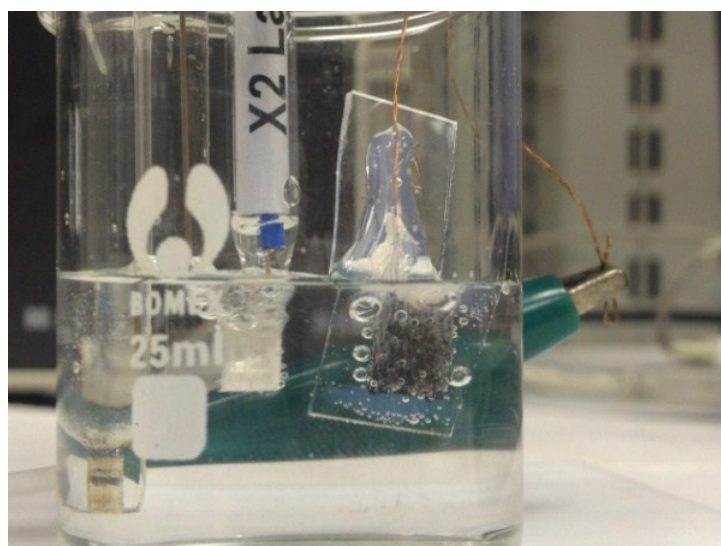

**Fig. S3** Optical photograph of 3D graphene/MoS<sub>2</sub> C electrode at -0.6 V vs. Ag/AgCl.

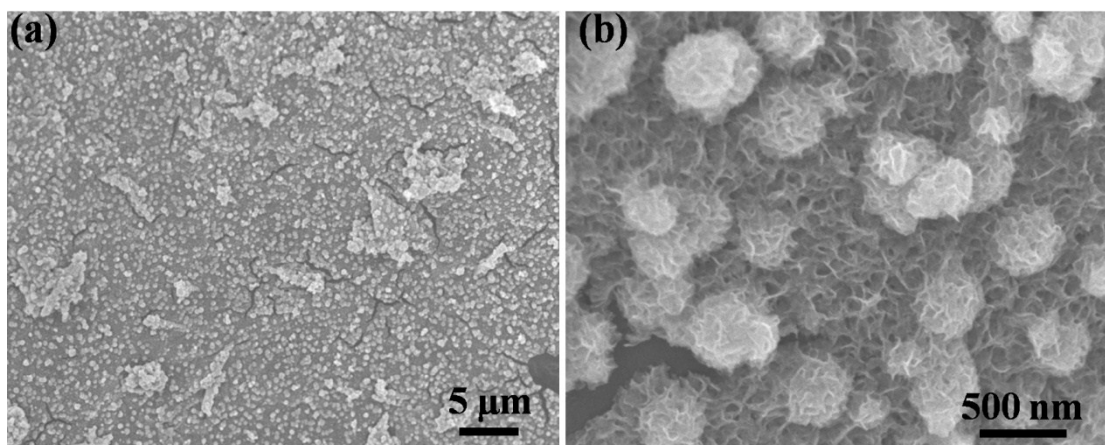

Fig. S4 SEM images of 3D graphene/MoS<sub>2</sub> C electrode after stability measurement.

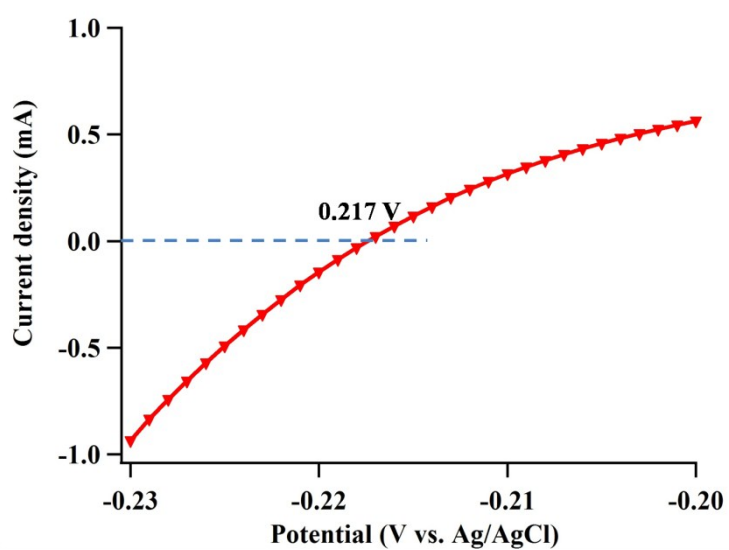

Fig. S5 Ag/AgCl reference electrode calibration in H<sub>2</sub>-saturated 0.5 M H<sub>2</sub>SO<sub>4</sub>

Table S1 Summary of HER parameters for various molybdenum sulfide catalysts

| Catalysts                                              | Onset potential (mV) | Exchange current density ( $\mu\text{A cm}^{-2}$ ) | Tafel slope ( $\text{mV dec}^{-1}$ ) | Tafel region (mV) | Current density at -200 mV ( $\text{mA cm}^{-2}$ ) | Ref.     |
|--------------------------------------------------------|----------------------|----------------------------------------------------|--------------------------------------|-------------------|----------------------------------------------------|----------|
| MoS <sub>2</sub> on Au electrode                       | 90                   | 9.3                                                | 69                                   | 90~190            | 4~6                                                | 3        |
| Defect rich MoS <sub>2</sub>                           | 120                  | 8.91                                               | 50                                   | 120~180           | 13                                                 | 4        |
| MWCNT/MoS <sub>2</sub>                                 | 90                   | —                                                  | 44.6                                 | 135~180           | 17                                                 | 5        |
| Carbon cloth/crumpled RGO/MoS <sub>x</sub>             | 100~120              | 10~100                                             | 51.9                                 | 135~180           | 75                                                 | 6        |
| RGO/MoS <sub>2</sub>                                   | 100                  | —                                                  | 41                                   | 100~140           | —                                                  | 7        |
| Ni foam/graphene/MoS <sub>x</sub>                      | 90~100               | —                                                  | 42.8                                 | 109-141           | 40~50                                              | 8        |
| Core-shell MoS <sub>2</sub> /MoO <sub>3</sub> nanowire | 150~200              | —                                                  | 50~60                                | —                 | < 2                                                | 9        |
| MoS <sub>x</sub> /glassy carbon electrode              | 100~120              | 0.04~0.15                                          | 40                                   | 120~200           | 14                                                 | 10       |
| MoS <sub>2</sub> quantum dots/MoS <sub>2</sub> sheets  | —                    | 32                                                 | 74                                   | —                 | —                                                  | 11       |
| Mesoporous RGO/MoS <sub>2</sub>                        | 100                  | 3                                                  | 42                                   | 90~120            | 100                                                | 12       |
| 3D graphene/MoS <sub>2</sub>                           | 110                  | 3.5                                                | 47                                   | 122-181           | 50                                                 | Our work |

## 6. Reference

1. X. C. Dong, H. Xu, X. W. Wang, Y. X. Huang, M. B. Chan-Park, H. Zhang, L. H. Wang, W. Huang and P. Chen, *Acs Nano*, 2012, **6**, 3206-3213.
2. X. C. Dong, X. W. Wang, L. H. Wang, H. Song, H. Zhang, W. Huang and P. Chen, *Acs Appl. Mater. Interfaces*, 2012, **4**, 3129-3133.
3. T. Y. Wang, L. Liu, Z. W. Zhu, P. Papakonstantinou, J. B. Hu, H. Y. Liu and M. X. Li, *Energy Environ. Sci.*, 2013, **6**, 625-633.
4. J. F. Xie, H. Zhang, S. Li, R. X. Wang, X. Sun, M. Zhou, J. F. Zhou, X. W. Lou and Y. Xie, *Adv. Mater.*, 2013, **25**, 5807-5813.

5. Y. Yan, X. M. Ge, Z. L. Liu, J. Y. Wang, J. M. Lee and X. Wang, *Nanoscale*, 2013, **5**, 7768-7771.
6. A. J. Smith, Y. H. Chang, K. Raidongia, T. Y. Chen, L. J. Li and J. X. Huang, *Adv. Energy Mater.*, 2014, **4**, 1400398.
7. Y. G. Li, H. L. Wang, L. M. Xie, Y. Y. Liang, G. S. Hong and H. J. Dai, *J. Am. Chem. Soc.*, 2011, **133**, 7296-7299.
8. Y. H. Chang, C. T. Lin, T. Y. Chen, C. L. Hsu, Y. H. Lee, W. J. Zhang, K. H. Wei and L. J. Li, *Adv. Mater.*, 2013, **25**, 756-760.
9. Z. B. Chen, D. Cummins, B. N. Reinecke, E. Clark, M. K. Sunkara and T. F. Jaramillo, *Nano Lett.*, 2011, **11**, 4168-4175.
10. D. Merki, S. Fierro, H. Vrubel and X. L. Hu, *Chem. Sci.*, 2011, **2**, 1262-1267.
11. D. Gopalakrishnan, D. Damien and M. M. Shaijumon, *Acs Nano*, 2014, **8**, 5297-5303.
12. L. Liao, J. Zhu, X. J. Bian, L. N. Zhu, M. D. Scanlon, H. H. Girault and B. H. Liu, *Adv. Funct. Mater.*, 2013, **23**, 5326-5333.
